# Supplementary material for: Nitrogen Functionalization of CVD Grown Three-Dimensional Graphene Foam for Hydrogen Evolution Reactions in Alkaline Media
Source: MDPI journal article supplement (doi:10.3390/ma14174952), 2021-08-30
Supplement: s1 [file s1]

## Supplementary Materials

# Nitrogen Functionalization of CVD Grown Three-Dimensional Graphene Foam for Hydrogen Evolution Reactions in Alkaline Media

Daniela Ion-Ebrașu <sup>1</sup>, Radu Dorin Andrei <sup>1</sup>, Stanică Enache <sup>1</sup>, Simona Căprărescu <sup>2,\*</sup>, Constantin Cătălin Negrilă <sup>3</sup>, Cătălin Jianu <sup>1</sup>, Adrian Enache <sup>1</sup>, Iulian Boerașu <sup>4</sup>, Elena Carcadea <sup>1</sup>, Mihai Varlam <sup>1</sup>, Bogdan Ștefan Vasile <sup>4</sup> and Jianwei Ren <sup>5</sup>

<sup>1</sup> National Institute for Cryogenics and Isotopic Technologies ICSI-Rm. Valcea, ICSI Energy, Uzinei Street, no. 4, 240050 Ramnicu Valcea, Romania; daniela.ebrasu@icsi.ro (D.I.-E.); radu.andrei@icsi.ro (R.D.A.); stanica.enache@icsi.ro (S.E.); Catalin.jianu@icsi.ro (C.J.); Adrian.enache@icsi.ro (A.E.); elena.carcadea@icsi.ro (E.C.); mihai.varlam@icsi.ro (M.V.)

<sup>2</sup> Inorganic Chemistry, Physical Chemistry and Electrochemistry Department, Faculty of Applied Chemistry and Materials Science, University POLITEHNICA of Bucharest, Gh. Polizu Street, no. 1–7, 011061 Bucharest, Romania

<sup>3</sup> National Institute for Materials Physics, P.O. Box MG-7, 77125 Bucharest, Romania; catalin.negrila@infim.ro

<sup>4</sup> National Research Center for Micro and Nanomaterials, Faculty of Applied Chemistry and Materials Science, University POLITEHNICA of Bucharest, Splaiul Independentei Street, no. 313, 060042 Bucharest, Romania; iulianboerasu@gmail.com (I.B.); bogdan.vasile@upb.ro (B.S.V.)

<sup>5</sup> Department of Mechanical Engineering Science, University of Johannesburg, Cnr Kingsway and University Roads, Auckland Park, Johannesburg 2092, South Africa; jren@uj.ac.za

\* Correspondence: simona.caprareescu@upb.ro

**Table S1.** C1s peak position and content (at %) for every carbon element determined from XPS measurements.

| Sp <sup>2</sup> hybridization characteristic | Position (eV)  | -      | -      | -      | -      | 290.41 | 290.22 |
|----------------------------------------------|----------------|--------|--------|--------|--------|--------|--------|
|                                              | Content (at %) | -      | -      | -      | -      | 13.6   | 18.4   |
| O-C=O                                        | Position (eV)  | -      | -      | -      | -      | 288.76 | 288.39 |
|                                              | Content (at %) | 4.2    | 4.1    | 2.7    | 1.5    | 11.2   | 14.7   |
| C=O                                          | Position (eV)  | 286.05 | 286.23 | 286.61 | 286.77 | 286.95 | 286.81 |
|                                              | Content (at %) | 5.1    | 6.6    | 4.7    | 3.9    | 13.2   | 15.9   |
| C-O                                          | Content (at %) | 5.1    | 6.6    | 4.7    | 3.9    | 13.2   | 15.9   |

| Sample ID      | C=C sp <sup>2</sup> |                | C-C sp <sup>3</sup> |                |
|----------------|---------------------|----------------|---------------------|----------------|
|                | Position (eV)       | Content (at %) | Position (eV)       | Content (at %) |
| GrFoam         | 283.88              | 86.7           | 284.80              | 4              |
| GrFoam1N       | 283.90              | 85.5           | 284.81              | 3.7            |
| GrFoam2N       | 283.91              | 82.3           | 284.89              | 10.4           |
| GrFoam3N       | 283.91              | 84             | 284.97              | 10.7           |
| GrFoamPt       | 284.13              | 53.7           | 285.04              | 8.2            |
| GrFoam1N<br>Pt | 284.15              | 43.4           | 285.10              | 7.6            |

**Table S2.** N1s peak position and content (at %) for every nitrogen element determined from XPS measurements.

| Pyrrolic N    |                | Graphitic N   |                | Pyridinic oxide N |                |
|---------------|----------------|---------------|----------------|-------------------|----------------|
| Position (eV) | Content (at %) | Position (eV) | Content (at %) | Position (eV)     | Content (at %) |
| -             | -              | 404.85        | 15.7           | -                 | -              |
| 399.69        | 51.2           | 402.03        | 7.8            | -                 | -              |
| 400.12        | 52.4           | 401.87        | 13.1           | -                 | -              |
| 399.51        | 40.5           | 402.39        | 9.6            | 406.27            | 11.00          |

| Sample ID  | Pyridinic N   |                |
|------------|---------------|----------------|
|            | Position (eV) | Content (at %) |
| GrFoam1N   | 399.74        | <b>84.3</b>    |
| GrFoam2N   | 398.30        | 41.4           |
| GrFoam3N   | 399.18        | <b>34.5</b>    |
| GrFoam1NPt | <b>398.03</b> | <b>39.00</b>   |

**Table S3.** Pt4f peak position and content (at %) for every platinum element determined from XPS measurements.

| $\text{Pt}^{2+}(4f^{7/2})$ | $\text{Pt}^{4+}(4f^{7/2})$ |               | $\text{Pt}^0(4f^{5/2})$ |               | $\text{Pt}^{2+}(4f^{5/2})$ |               | $\text{Pt}^{4+}(4f^{5/2})$ |               |
|----------------------------|----------------------------|---------------|-------------------------|---------------|----------------------------|---------------|----------------------------|---------------|
|                            | Content (at %)             | Position (eV) | Content (at %)          | Position (eV) | Content (at %)             | Position (eV) | Content (at %)             | Position (eV) |
| -                          | -                          | -             | -                       | 74.05         | -                          | -             | -                          | -             |
| 16.4                       | 74.13                      | 74.44         | 6.1                     | 74.44         | -                          | 76.03         | -                          | 77.23         |

| Sample ID  | Pt <sup>0</sup> (4f <sup>7/2</sup> ) |                |               |
|------------|--------------------------------------|----------------|---------------|
|            | Position (eV)                        | Content (at %) | Position (eV) |
| GrFoamPt   | 70.75                                | 100            | -             |
| GrFoam1NPt | 71.16                                | 77.5           | 72.70         |
